# Supplementary material for: The impact of growth mindset on adolescents’ health risk behaviors: the chain mediating roles of core self-evaluation and coping styles
Source: Research Square preprint supplement (doi:10.21203/rs.3.rs-8204472/v1), 2025-12-22
Supplement: Supplementary file 1 [file 97f2afc987741c146a69f54d.docx]

**Supplementary materials**

To verify the robustness of the results, scores for HRBs were recoded from continuous to dichotomous variables and reanalyzed. Each dimension was coded as 0 (no behavior reported) or 1 (behavior reported), following the questionnaire manual and previous studies [1-3]. Because the scoring method was modified, the model was re-estimated using the weighted least squares mean and variance adjusted (WLSMV) estimator suitable for categorical variables.

The measurement model for T3 HRBs demonstrated acceptable fit (χ²/*df* = 1.12, CFI = 0.99, TLI = 0.99, RMSEA = 0.02, SRMR = 0.10) and statistically significant factor loadings across all five indicators (0.25-0.64), supporting its overall validity. Although the factor loading for sedentary behavior was 0.25, below the commonly cited minimum threshold of 0.30, this indicator was retained together with the others on theoretical grounds to ensure that the latent construct captured the full breadth of adolescent HRBs.

**Longitudinal Sequential Mediation Analysis**

Table S1 presents the standardized path coefficients of the structural model. After controlling for gender, age, and parental educational level, T1 growth mindset negatively predicted T3 HRBs (β = -0.117, *p* < 0.05). It positively predicted T2 CSE (β = 0.504, *p* < 0.001) and T2 positive coping style (β = 0.230, *p* < 0.001), but showed no significant association with T2 negative coping style. T2 CSE positively predicted T2 positive coping style (β = 0.385, *p* < 0.001), and negatively predicted both T2 negative coping style (β = -0.113, *p* < 0.05) and T3 HRBs (β = -0.315, *p* < 0.001). In addition, T2 positive coping style negatively predicted T3 HRBs (β = -0.199, *p* < 0.01), whereas T2 negative coping style positively predicted T3 HRBs (β = 0.220, *p* < 0.001).

| **Table S1** Path coefficients of the chain mediation model (N = 534) | | | | |
| --- | --- | --- | --- | --- |
| Outcome | Predictor | *R2* | β | *t* |
| T2CSE |  | 0.261 |  |  |
|  | T1GM |  | 0.504 | 17.840*** |
|  | Sex |  | -0.021 | -0.546 |
|  | Age |  | -0.026 | -0.681 |
|  | Fedu |  | 0.038 | 0.924 |
|  | Medu |  | 0.011 | 0.237 |
| T2CP-p |  | 0.300 |  |  |
|  | T1GM |  | 0.230 | 7.896*** |
|  | T2CSE |  | 0.385 | 11.378*** |
|  | Gender |  | -0.019 | -0.504 |
|  | Age |  | 0.010 | 0.275 |
|  | Fedu |  | 0.069 | 1.462 |
|  | Medu |  | -0.074 | -1.459 |
| T2CP-n |  | 0.038 |  |  |
|  | T1GM |  | -0.049 | -1.100 |
|  | T2CSE |  | -0.113 | -2.590* |
|  | Gender |  | -0.138 | -3.026** |
|  | Age |  | -0.037 | -0.806 |
|  | Fedu |  | 0.027 | 0.476 |
|  | Medu |  | -0.058 | -0.974 |
| T3HRBs |  | 0.362 |  |  |
|  | T1GM |  | -0.117 | -1.999* |
|  | T2CSE |  | -0.315 | -4.391*** |
|  | T2CP-p |  | -0.199 | -3.077** |
|  | T2CP-n |  | 0.220 | 3.890*** |
|  | Gender |  | -0.041 | -0.758 |
|  | Age |  | 0.042 | 0.832 |
|  | Fedu |  | 0.129 | 1.751 |
|  | Medu |  | -0.005 | -0.068 |
| Notes. GM = growth mindset, CSE = core self-evaluation, CP-p = positive coping style, CP-n = negative coping style, HRBs = health risk behaviors, Fedu = father’s educational level, Medu = mother’s educational level. **p*<0.05, ***p*<0.01, ****p*<0.001. | | | | |

As shown in Table S2, robustness analyses using an alternative scoring method yielded consistent results. The total effect of T1 growth mindset on T3 HRBs remained stable, with the direction of the effect consistent and statistically significant (c = -0.384, *p* < 0.001), as did direct effect (c’ = -0.117, *p* = 0.046).

Four mediation paths were significant: (1) via CSE (T1 GM → T2 CSE → T3 HRBs, β = -0.159, *p* < 0.001); (2) via positive coping style (T1 GM → T2 CP-p → T3 HRBs, β = -0.046, *p* < 0.01); (3) sequentially via CSE and positive coping style (T1 GM → T2 CSE → T2 CP-p → T3 HRBs, β = -0.039, *p* < 0.01); (4) sequentially via CSE and negative coping style (T1 GM → T2 CSE → T2 CP-n → T3 HRBs, β = -0.013, *p* < 0.05).

The indirect path through negative coping alone was not significant. Bootstrap analyses (Table S2) confirmed that indirect effects accounted for 69.27% of the total effect, with the strongest mediation through CSE (41.41%). Effect size fluctuations across robustness checks were within 5.36%, and the direction and significance of the paths remained stable, supporting the robustness of the main findings.

| **Table S2** Bootstrap test of mediation effects | | | | | | |
| --- | --- | --- | --- | --- | --- | --- |
|  | |  | Effect | *SE* | *p* | Effect sizes |
| Total | |  | -0.384 | 0.059 | 0.000 | 100% |
| Direct | |  | -0.117 | 0.059 | 0.046 | 30.47% |
| Total indirect | |  | -0.266 | 0.037 | 0.000 | 69.27% |
|  | | T1GM→T2CSE→T3HRBs | -0.159 | 0.037 | 0.000 | 41.41% |
|  | | T1GM→T2CP-p→T3HRBs | -0.046 | 0.017 | 0.006 | 11.98% |
|  | | T1GM→T2CP-n→T3HRBs | -0.011 | 0.010 | 0.289 | 2.86% |
|  | T1GM→T2CSE→T2CP-p→T3HRBs | | -0.039 | 0.013 | 0.003 | 10.16% |
|  | T1GM→T2CSE→T2CP-n→T3HRBs | | -0.013 | 0.006 | 0.035 | 3.39% |
| Notes. GM = growth mindset, CSE = core self-evaluation, CP-p = positive coping, CP-n = negative coping, HRBs = health risk behaviors. | | | | | | |

**Reference**

1. Ji C. *Comprehensive report on health-related/risky behaviors of adolescents in China, 2005.* Beijing: People’s Medical Publishing House; 2007.

2. Sun Z, Zhang X, Yuan W, Dong Y, Xu K, Zhao S, Chen L, Liu Z. Association of health risk behaviors with obesity and depressive symptoms in middle school students. Chinese Journal of School Health. 2024;45(10):1505–1510.

3. Yu J, Liu Y, Liao L, Yan J, Wang H. Cluster analysis of sleep time and adolescent health risk behaviors. INQUIRY: The Journal of Health Care Organization, Provision, and Financing. 2023;60:00469580231153272.
